# Supplementary material for: Chronotype and trait self-control as unique predictors of sleep quality in Chinese adults: The mediating effects of sleep hygiene habits and bedtime media use
Source: PubMed Central journal article supplement (PMC9012385; doi:10.1371/journal.pone.0266874), 2022-04-15
Supplement: pone.0266874.s001.pdf [file pone.0266874.s001.pdf]

**Table S1. Results from moderated mediation model**

| Predictors                      | M1: SH1       |          | M2: SH2       |          | M3: SH3       |          | M4: SH4       |          | M5: Bedtime media use |          | Y: Sleep quality |          |
|---------------------------------|---------------|----------|---------------|----------|---------------|----------|---------------|----------|-----------------------|----------|------------------|----------|
|                                 | <i>b (SE)</i> | <i>p</i> | <i>b (SE)</i> | <i>p</i> | <i>b (SE)</i> | <i>p</i> | <i>b (SE)</i> | <i>p</i> | <i>b (SE)</i>         | <i>p</i> | <i>b (SE)</i>    | <i>p</i> |
| Constant                        | .02 (.14)     | .873     | .04 (.13)     | .770     | -.09 (.10)    | .381     | .19 (.15)     | .218     | .06 (.18)             | .737     | 4.26 (.10)       | .000     |
| Age D1                          | .11 (.13)     | .402     | -.07 (.11)    | .562     | .01 (.09)     | .927     | .00 (.13)     | .982     | .16 (.16)             | .314     | .23 (.06)        | .887     |
| Age D2                          | .59 (.22)     | .008     | .31 (.20)     | .118     | -.04 (.16)    | .804     | -.21 (.23)    | .368     | -.30 (.28)            | .288     | .02 (.01)        | .628     |
| Gender                          | -.30 (.14)    | .034     | -.15 (.12)    | .227     | .08 (.10)     | .425     | -.18 (.15)    | .217     | -.17 (.18)            | .330     | .01 (.02)        | .762     |
| Marital status                  | .21 (.13)     | .094     | .17 (.11)     | .133     | .06 (.09)     | .545     | -.03 (.13)    | .821     | .08 (.16)             | .606     | -.01 (.08)       | .550     |
| Trait self-control              | .17 (.09)     | .070     | .16 (.08)     | .052     | .16 (.07)     | .022     | .23 (.10)     | .019     | -.19 (.12)            | .097     | -.07 (.15)       | .000     |
| Chronotype (Morningness)        | .05 (.02)     | .003     | .07 (.01)     | .000     | .00 (.01)     | .737     | .03 (.02)     | .123     | -.08 (.02)            | .000     | .03 (.10)        | .152     |
| Chronotype × Trait self-control | .06 (.02)     | .021     | .05 (.02)     | .030     | -.01 (.02)    | .591     | -.01 (.03)    | .765     | -.04 (.03)            | .242     | -.05 (.08)       | .506     |
| M1: SH1                         |               |          |               |          |               |          |               |          |                       |          | .29 (.05)        | .000     |
| M2: SH2                         |               |          |               |          |               |          |               |          |                       |          | .04 (.06)        | .466     |
| M3: SH3                         |               |          |               |          |               |          |               |          |                       |          | .08 (.07)        | .226     |
| M4: SH4                         |               |          |               |          |               |          |               |          |                       |          | .19 (.05)        | .000     |
| M5: Bedtime media use           |               |          |               |          |               |          |               |          |                       |          | -.10 (.04)       | .011     |
| Chronotype × M1                 |               |          |               |          |               |          |               |          |                       |          | -.04 (.02)       | .016     |
| Chronotype × M2                 |               |          |               |          |               |          |               |          |                       |          | .01 (.02)        | .603     |
| Chronotype × M3                 |               |          |               |          |               |          |               |          |                       |          | -.03 (.02)       | .152     |
| Chronotype × M4                 |               |          |               |          |               |          |               |          |                       |          | -.01 (.01)       | .511     |
| Chronotype × M5                 |               |          |               |          |               |          |               |          |                       |          | -.02 (.01)       | .078     |
|                                 | $R^2 = .19$   |          | $R^2 = .21$   |          | $R^2 = .04$   |          | $R^2 = .05$   |          | $R^2 = .12$           |          | $R^2 = .52$      |          |

Note. Age D1 was coded as 0 for 21-30 years and 1 for 31-50 years, whereas age D2 was coded as 0 for 21-30 years and 1 for 50 years or above. Gender was coded 0 for men and 1 for women. Marital status was coded as 0 for single, divorced or widowed and 1 for married. SH1 = pre-sleep stress management, SH2 = sleep timing regularity, SH3 = avoiding sleep-disrupting food or activities, SH4 = keeping a restful sleep environment.
